# Supplementary material for: Use of trihalomethanes as a surrogate for haloacetonitrile exposure introduces misclassification bias
Source: PubMed Central journal article supplement (PMC7851183; doi:10.1016/j.wroa.2021.100089), 2021-01-22
Supplement: mmc1.pdf [file mmc1.pdf]

Supplemental Information for:  
Use of trihalomethanes as indicator of DBP exposure introduces potential for  
classification bias

Kirin E. Furst<sup>1,2\*</sup>, Jose Bolorinos<sup>1</sup>, and William A. Mitch<sup>1</sup>

<sup>1</sup> Department of Civil and Environmental Engineering, Stanford University, 473 Via Ortega, Stanford, California 94305, United States

<sup>2</sup> Department of Civil, Environmental and Infrastructure Engineering, George Mason University, 4400 University Dr, Fairfax, VA 22030, United States

\* Contact Information: Email: kfurst@gmu.edu, Phone: 703-993-3394

Table of Contents

|                                                                            |           |
|----------------------------------------------------------------------------|-----------|
| <b>Supplemental Text S1: Data processing .....</b>                         | <b>2</b>  |
| <b>Supplemental Text S2: Sensitivity Analysis .....</b>                    | <b>4</b>  |
| <b>Supplemental Text S3: Analysis of bias in risk ratio estimates.....</b> | <b>5</b>  |
| <b>Additional References .....</b>                                         | <b>7</b>  |
| <b>Supplemental Figures.....</b>                                           | <b>9</b>  |
| <b>Supplemental Tables .....</b>                                           | <b>11</b> |

Key to abbreviations in this document:

ICR: Information Collection Rule

WTP: Water treatment plant

PWS: Public water system

HANs: haloacetonitriles

THMs: trihalomethanes

## Supplemental Text S1: Data processing

### Data processing

The ICR AUX1 database was retrieved from the EPA data repository as a Microsoft Access file (.accdb) (US EPA, 2000) and extracted to Excel (.xlsx). Data was processed with Python v3.7 in the open-source scientific computing environment IPython v7.12 (Perez & Granger, 2007) using Pandas v1.0 (McKinney, 2012). Statistical analyses were conducted using Pandas and SciPy v1.18 (Virtanen et al., 2010). Figures were developed using Seaborn v0.10.1 (Waskom et al., 2018). Multilevel models were developed with Pymc4 v0.7.0, an open-source Python statistics library that interfaces with the lme4 package in the R statistical programming language (Jolly, 2018).

### Screening

#### *Source water*

The ICR AUX 1 database contains a field for the source water type utilized by each WTP during the month of each sampling event. This field can take one of four categories: surface water (SW), groundwater (GW), mixed (MIX), and purchased/wholesale (PUR). MIX indicates multiple source water types with none exceeding 80% total flow. An additional field further specifies SW subcategories, of which one is groundwater under the influence of surface water (GI). For this study, GI was designated as a separate source water type, as examination of water quality parameters indicate it is distinct from other SW subcategories. A subset of ICR PWSs blended finished waters from multiple WTPs in the distribution system. These records were excluded, as it is impossible to ascertain which WTPs blended finished waters in what proportion. The source category field was empty (null) for 4% of records (n=384); all null entries were successfully recovered by examining other water resources information for that WTP during the month of sampling. Following screening, the records were 71% surface water (n=6772), 25% groundwater (n=2405), and 1–2% each of the remaining categories (Table S1A).

#### *Season*

ICR WTPs conducted sampling once per sample quarter over six quarters, defined in 3-month increments between July 2017 and December 2018. As one goal of the study was to evaluate the effects of season on the HAN:THM ratio, the month of sampling was used to re-sort records into quarters defined based on seasonal trends for North America, as indicated in Table S1A.

#### *Distribution system residence time.*

The distribution system sampling location was indicated by field EVNTTYPE, where the possible values are indicated in Table S1B along with the distribution of estimated RTs for each for each sampling location. The sampling location was used as a categorical proxy for distribution system residence time (RT) for two reasons: 1) The RT estimates were unreliable for many records, as indicated by a parameter rating the confidence level (high, medium, low) in the accuracy of the RT estimate, and whether blending occurred in the distribution system. Records with a high confidence rating were in the minority, and the reason for a low or medium rating (RT estimate, blending, or both) was not indicated. 2) The intermediate sampling locations (DSE, AVG1, AVG2) between finished effluent (FINISH) and the maximum RT (MAX) were not always sampled along the same distribution system branch; for example, AVG1 could be located between FINISH and MAX, while AVG2 is from a different branch.

#### *Disinfectant sequence.*

In the ICR AUX 1 database, for each WTP sampling period, the WTP\_DIS field denotes the disinfectant(s) applied upstream of final residual application, and the DS\_DIS field denotes the final disinfectant applied. Possible values for WTP\_DIS are chlorine (CL2), chloramines (CLM), chlorine-chloramine (CL2-CLM), chlorine dioxide (CLX), ozone (O3), and null. Obolensky et al., (2007) replaced missing or erroneous WTP\_DIS entries for 20% of records; unfortunately, details were not reported allowing us to emulate the

methods. For the present study, 19% (n=1,835) had null WTP\_DIS entries. 14 null and 25 erroneous WTP\_DIS entries were replaced (representing <1% of total records) following inspection of other WTP\_DIS entries and process train information for that WTP. 1.2% of records (n=115) had null DS\_DIS entries; all were replaced with CL2 or CLM following inspection of other DS\_DIS entries and utility process information for that WTP, as well as relative concentrations of free and total chlorine residuals. WTP\_DIS and DS\_DIS entries were then concatenated for each record to create the disinfectant sequence. Two WTPs (20 records) had null WTP\_DIS entries and CLM designated for DS\_DIS; as mean THM and HAN concentrations were similar for between CLM and CLM-CLM, these records were reassigned as CLM-CLM for simplicity. The disinfectant sequences and number of records are provided in Table S1A.

## Supplemental Text S2: Sensitivity Analysis

In many records, concentrations of one or more constituent species were below the method reporting limits (MRL) of 1.0 µg/L for each THM species and 0.5 µg/L for each HAN species. The fraction of left-censored records was 15% for HANs and 7.6% for THMs. For the results presented in the main text, left-censored measurements were replaced by half of the MRL for each DBP analyte (i.e., the “half-MRL” dataset). If the measurements for all 4 HANs in a sample were left-censored, the cumulative replacement value was 1.0 µg/L, and if all four THMs were censored, the cumulative replacement value was 2.0 µg/L.

The selection of replacement values for MRLs can affect the outcome of models using ICR data (Obolensky et al., 2005; Francis et al., 2009). The impact of the replacement value selection was tested on the multilevel models used in this study by comparing results when left-censored HAN and THM concentrations were replaced with the half-MRL values (e.g., the half-MRL dataset) versus the full-MRL values (e.g., the full-MRL dataset). The distributions of THM and HAN concentrations were shifted slightly higher in the full-MRL dataset. On a nM/nM basis, the median HAN:THM ratio was 0.16, compared to 0.14 for the half-MRL dataset, with a maximum of 1.72, compared to 2.2 for the half-MRL dataset; thus, the distribution of ratios was altered by the replacement of left-censored values.

The bivariate model with HANs regressed on THMs (Eq. 1) and the univariate model with HAN:THM as the outcome variable (Eq. 2) were fit to the half-MRL dataset and the full-MRL dataset, and to evaluate the change in estimated variances. For the bivariate model, the total variance was ~65% lower when fit to the full-MRL dataset compared to the half-MRL dataset (Table S2B). For the univariate model, the total variance was ~18% lower when fit to the full-MRL dataset (Table 4B) compared to the half-MRL dataset (Table 4A). Therefore, the bivariate model is more sensitive to left-censoring of concentrations, likely because the homogeneity of the 1,465 left-censored HAN measurements biases the bivariate model towards lower overall variance. In the univariate model with the HAN:THM ratio, left-censored HAN measurements are less influential because 57% (n=832) are divided by uncensored THM measurements. Only 6.6% of HAN:THM outcomes represent records where both HAN and THM measurements were censored, compared to 15% of HAN outcomes in the bivariate model.

The multilevel model with categorical predictors and interaction terms (Eq. 3) was rerun with the full-MRL dataset (Table S5C) for comparison with the half-MRL results reported in the main text (Table S5A, S5B). The systematic and residual variances were both almost 20% less than the estimates for the half-MRL dataset. However, the relative contributions of systematic and residual variance to the total variance remained consistent, with the systematic variance (0.233) higher than the residual variance (0.156). For the model fit to the full-MRL dataset, the conditional geometric mean HAN:THM ratio was 0.134, an 11.7% increase over the model run with the half-MRL dataset. The estimated effects of disinfectant sequence, season, and distribution system location were not substantially changed for surface water. However, some of the interactions of groundwater and groundwater under the influence with disinfectant sequence were smaller by up to 50%, reflecting the fact that groundwater-based source water types were more impacted by left-censoring. The results do not change the conclusions of the main text.

### Supplemental Text S3: Analysis of bias in risk ratio estimates

As described in the main analysis, the health impacts of DBP-exposure are typically analyzed using logistic regression, which models the probability of a given health outcome  $Y$  as a function of a DBP exposure proxy ( $Z$ ) and a set of other covariates  $W_j$ :

$$(S1) \quad P(Y) = \frac{\exp(\alpha + \lambda Z + \sum_j \gamma_j W_j)}{1 + \exp(\alpha + \lambda Z + \sum_j \gamma_j W_j)}$$

Where  $P(Y)$  is the probability of the adverse health outcome of interest and the coefficient  $\lambda$  measures the impact of proxied DBP exposure  $Z$ . In many studies, the exposure proxy  $Z$  is categorical (i.e., 1 if THM4 is within a given range and zero otherwise), such that the estimate  $\lambda$  is equivalent to the odds ratio for outcome  $Y$  for populations with observed exposure to DBPs relative to a base case – after controlling for the vector of  $W_j$  covariates:

$$(S2) \quad \lambda = \frac{\frac{P(Y|Z,W)}{P(Y'|Z,W)}}{\frac{P(Y|Z',W)}{P(Y'|Z',W)}} = \frac{P(Y|Z,W) P(Y'|Z',W)}{P(Y|Z',W) P(Y'|Z,W)}$$

In (S2) above,  $Y$  and  $Z$  denote the events where a person has disease outcome  $Y$  and observed exposure to DBPs, respectively (i.e.  $Y = 1$  and  $Z = 1$ ), and  $Y'$  and  $Z'$  are their complements (i.e.  $Y'$  and  $Z'$  denote events where  $Y = 0$  and  $Z = 0$ ), in which the disease outcome is negative and there is no observed exposure to DBPs;  $W$  is the vector of other covariates  $W_j$ .

Recall, that  $Z$  is based on high THM levels, and is only a proxy indicator of the true DBP exposure. A new binary variable is thus defined based on true DBP exposure  $X$ . This true exposure variable has complement  $X'$  denoting no actual DBP exposure (i.e.  $X = 0$ ). The true odds ratio  $\lambda^*$  defining risk of DBP exposure is thus:

$$(S3) \quad \lambda^* = \frac{P(Y|X,W) P(Y'|X',W)}{P(Y|X',W) P(Y'|X,W)}$$

Several assumptions are made to estimate bias in the estimate  $\lambda$  of the true odds ratio  $\lambda^*$ . First, health condition  $Y$  is assumed to have a low prevalence rate, such that  $P(Y'|X', W)$  and  $P(Y'|X, W)$  are both very close to 1 and the odds ratios given in (S2) and (S3) are very similar to risk ratios (i.e.  $\frac{P(Y|Z,W)}{P(Y|Z',W)}$  and  $\frac{P(Y|X,W)}{P(Y|X',W)}$ ):

$$(S4) \quad \lambda^* = \frac{P(Y|X,W) P(Y'|X',W)}{P(Y|X',W) P(Y'|X,W)} \approx \frac{P(Y|X, W)}{P(Y|X', W)} = \lambda_{RR}$$

The assumption of low prevalence is justifiable for both bladder cancer and congenital anomalies. One review of bladder cancer found a high-end prevalence rate of 185 per 100,000 males in Italy (Crocetti et al., 2013), corresponding to the probability of an Italian male not getting bladder cancer,  $P(Y')$  of 99.8%. The prevalence of any congenital anomaly in Europe was found to be 2.4%, but individual anomaly classes are rarer (the most common anomaly is 0.65%, corresponding to a  $P(Y')$  of 99.35%.) (Dolk et al., 2010).

Misclassification of true exposure  $X$  is also assumed to be determined by water quality parameters that are independent of covariates  $W$  or health outcome  $Y$  (i.e. misclassification is non-differential). Estimation of odds ratio bias for differential exposure misclassification with respect to  $Y$  or  $W$  is left as a topic for future study. Assuming nondifferential misclassification of  $X$ ,  $P(Y|Z, W)$  and  $P(Y|Z', W)$  in (5) above to be factored as follows:

$$(S5) \quad P(Y|Z, W) = \frac{P(Y|X, W)P(X,Z) + P(Y|X', W)P(X',Z)}{P(Z)}$$

$$(S6) \quad P(Y|Z', W) = \frac{P(Y|X, W)P(X, Z') + P(Y|X', W)P(X', Z')}{P(Z')}$$

Note that (S5) and (S6) also assume that  $Z$  (THM indicator) affects  $Y$  (disease outcome) only through its association with true exposure  $X$  (HAN indicator). Substituting the expressions for  $P(Y|Z, W)$  and  $P(Y|Z', W)$  in (S5) and (S6) above into an estimated risk ratio from observed DBP exposure ( $Z$ ), we get the following:

$$(S7) \quad \lambda_{RR} = \frac{P(Z')}{P(Z)} \frac{P(Y|X, W)P(X, Z) + P(Y|X', W)P(X', Z)}{P(Y|X, W)P(X, Z') + P(Y|X', W)P(X', Z')}$$

Where  $P(X, Z)$ ,  $P(X', Z)$ ,  $P(X, Z')$ ,  $P(X', Z')$  are probabilities of true positive, false positive, false negative, and true negative DBP exposure classification, respectively, from using THMs as an indicator variable. (S7) can then be expressed in terms of the true risk-ratio  $\lambda_{RR}^*$  and these probabilities, which can be computed empirically from ICR data:

$$(S8) \quad \lambda_{RR} = \frac{P(Z')}{P(Z)} \left( \frac{\lambda_{RR}^* P(X, Z)}{\lambda_{RR}^* P(X, Z') + P(X', Z')} + \frac{\lambda_{RR}^{*-1} P(X', Z)}{\lambda_{RR}^{*-1} P(X', Z') + P(X, Z')} \right)$$

Table S9 shows odds-ratio ratio estimates from meta-analyses of the risks of bladder cancer (Hrudey et al., 2015) and reproductive (congenital) anomalies (Nieuwenhuijsen et al., 2009) from DBP-exposure, which were used as a reference point for gauging the magnitude of odds-ratio bias likely to result from DBP exposure misclassification. The THM concentration threshold used as an indicator in this study is the 90<sup>th</sup> percentile concentration in the ICR dataset (74.3  $\mu\text{g/L}$ ). In the cited studies, the range of THM thresholds varies widely (20-130  $\mu\text{g/L}$ ), as does the range of baseline THM concentrations (1-60  $\mu\text{g/L}$ ). Given this, it is important to note that these estimates are included in our analysis purely for contextual purposes and are not intended to be used to infer actual odds-ratio bias.

## Additional References

- Bove F., Shim Y., Zeitz P., 2002. Drinking water contaminants and adverse pregnancy outcomes: a review. *Environ Health Perspect.* 110 Suppl 1(Suppl 1):61-74. <https://doi.org/10.1289/ehp.02110s161>
- Hwang B. F., Jaakkola J. J., 2003. Water chlorination and birth defects: a systematic review and meta-analysis. *Arch Environ Health.* 58(2):83-91. <https://doi.org/10.3200/AEOH.58.2.83-91>.
- Cantor, K. P., Villanueva, C. M., Silverman, D. T., Figueroa, J. D., Real, F. X., Garcia-Closas, M., Malats, N., Chanock, S., Yeager, M., Tardon, A., Garcia-Closas, R., Serra, C., Carrato, A., Castaño-Vinyals, G., Samanic, C., Rothman, N., & Kogevinas, M., 2010. Polymorphisms in GSTT1, GSTZ1, and CYP2E1, disinfection by-products, and risk of bladder cancer in Spain. *Environmental health perspectives.* 118(11), 1545–1550. <https://doi.org/10.1289/ehp.1002206>
- Chevrier, C., Junod, B., & Cordier, S. (2004). Does Ozonation of Drinking Water Reduce the Risk of Bladder Cancer *Epidemiology.* 15(5), 605-614. Retrieved October 12, 2020, from <http://www.jstor.org/stable/20485960>
- Chisholm K., Cook A., Bower C., Weinstein P., 2008. Risk of birth defects in Australian communities with high brominated disinfection by-product levels. *Environ Health Perspect.* 116:1267–1273. <https://doi.org/10.1289/ehp.10980>
- Crocetti, E., De Angelis, R., Buzzoni, C. *et al.*, 2013. Cancer prevalence in United States, Nordic Countries, Italy, Australia, and France: an analysis of geographic variability. *Br J Cancer* **109**, 219–228. <https://doi.org/10.1038/bjc.2013.311>
- Dolk H., Loane M., Garne E., 2010. The Prevalence of Congenital Anomalies in Europe. In: Posada de la Paz M., Groft S. (eds) *Rare Diseases Epidemiology. Advances in Experimental Medicine and Biology*, vol 686. Springer, Dordrecht. [https://doi.org/10.1007/978-90-481-9485-8\\_20](https://doi.org/10.1007/978-90-481-9485-8_20)
- Francis, R.A., Small, M.J., VanBriesen, J.M., 2009. Multivariate distributions of disinfection by-products in chlorinated drinking water. *Water Res.* 43, 3453–3468. <https://doi.org/10.1016/j.watres.2009.05.008>
- Hrudey, S.E., Backer, L.C., Humpage, A.R., Krasner, S.W., Michaud, D.S., Moore, L.E., Singer, P.C., Stanford, B.D., 2015. Evaluating Evidence for Association of Human Bladder Cancer with Drinking-Water Chlorination Disinfection By-Products. *J. Toxicol. Environ. Heal. - Part B Crit. Rev.* 18, 213–241. <https://doi.org/10.1080/10937404.2015.1067661>
- Jolly, E., 2018. Pymer4: Connecting R and Python for Linear Mixed Modeling. *J. Open Source Softw.* 3, 862. <https://doi.org/10.21105/joss.00862>
- King W. D., Marrett L. D., 1996. Case-control study of bladder cancer and chlorination by-products in treated water (Ontario, Canada). *Cancer Causes Control.* 7(6):596-604. <https://doi.org/10.1007/BF00051702>.
- McKinney, W., 2012. *Python for data analysis: Data wrangling with Pandas, NumPy, and IPython.* O'Reilly Media, Inc.
- Nieuwenhuijsen MJ, Toledano MB, Bennett J, Best N, Hambly P, de Hoogh K, et al. 2008. Chlorination disinfection by-products and risk of congenital anomalies in England and Wales. *Environ Health Perspect.* 116:216–222. <https://doi.org/10.1289/ehp.10636>
- Nieuwenhuijsen, M.J., Martinez, D., Grellier, J., Bennett, J., Best, N., Iszatt, N., Vrijheid, M., Toledano, M.B., 2009. Chlorination Disinfection By-Products in Drinking Water and Congenital Anomalies: Review and Meta-Analyses. *Environ. Health Perspect.* 117, 1486–1493. <https://doi.org/10.1289/ehp>

- Obolensky, A., Singer, P.C., 2005. Halogen substitution patterns among disinfection byproducts in the information collection rule database. *Environ. Sci. Technol.* 39, 2719–2730. <https://doi.org/10.1021/es0489339>
- Pérez, F., Granger, B.E., 2007. IPython: A system for interactive scientific computing. *Comput. Sci. Eng.* 9, 21–29. <https://doi.org/10.1109/MCSE.2007.53>
- Villanueva C. M., Cantor K. P., Grimalt J.O., Malats N., Silverman D., Tardon A., Garcia-Closas R., Serra C., Carrato A., Castaño-Vinyals G., Marcos R., Rothman N., Real F.X., Dosemeci M., Kogevinas M., 2007. Bladder cancer and exposure to water disinfection by-products through ingestion, bathing, showering, and swimming in pools. *Am J Epidemiol.* 165(2):148-56. <https://doi.org/10.1093/aje/kwj364>.
- Virtanen, P., Gommers, R., Oliphant, T.E., Haberland, M., Reddy, T. et al., 2020. SciPy 1.0: fundamental algorithms for scientific computing in Python. *Nat. Methods* 17, 261–272. <https://doi.org/10.1038/s41592-019-0686-2>
- Waskom, M., Botvinnik, O., Hobson, P., Warmenhoven, J., Cole, J.B., Halchenko, Y., Vanderplas, J., Hoyer, S., Villalba, S., Quintero, E., others, 2014. Seaborn: statistical data visualization. URL <https://seaborn.pydata.org/>(visited 2017-05-15). <https://doi.org/https://doi.org/10.5281/zenodo.1313201>



## Supplemental Figures

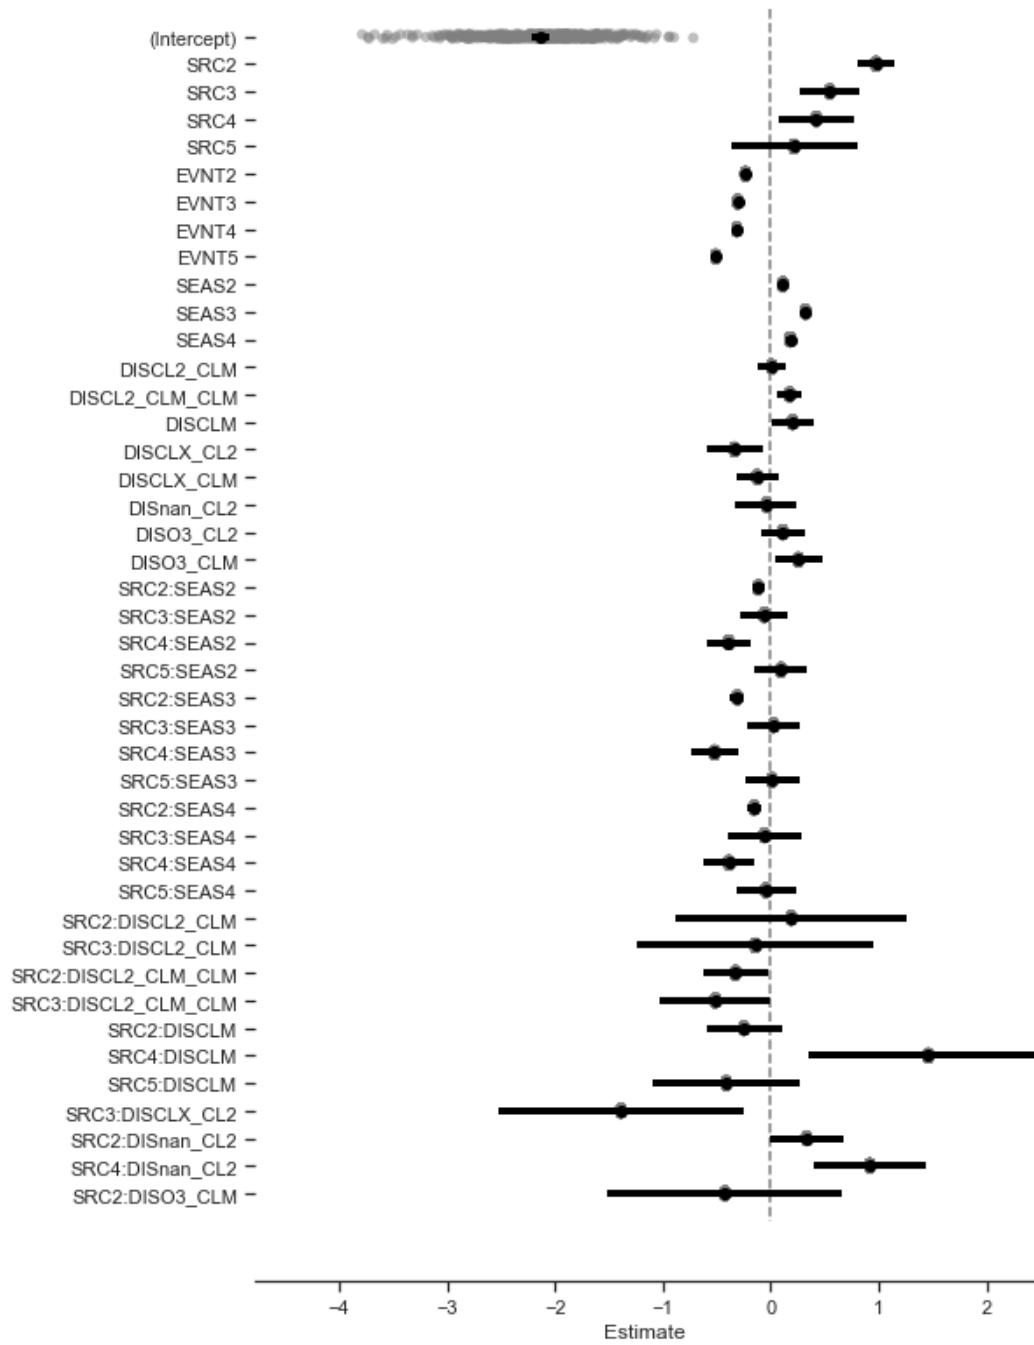

**Figure S1:** Plot showing the fixed and random effects on the conditional expected mean (intercept), and fixed effects of all predictor variables on the expected mean (with 95% confidence intervals) on a logarithmic scale.

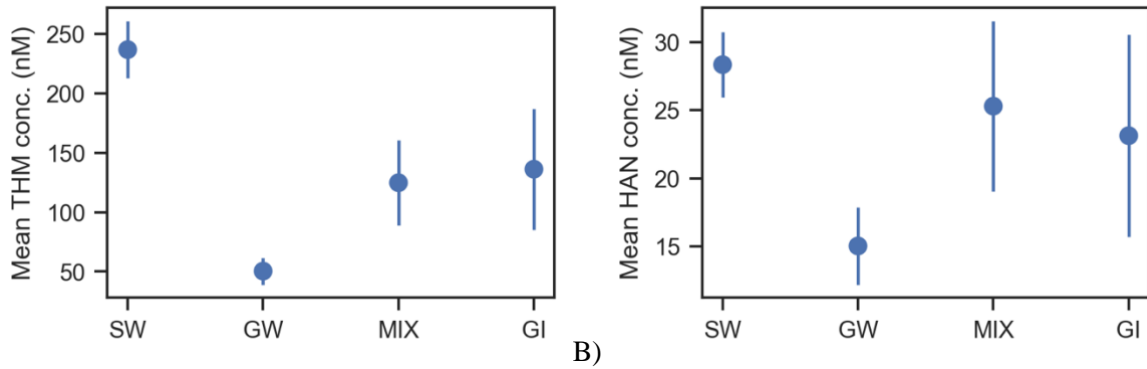

**Figure S2:** Estimated geometric mean of A) THM and B) HAN concentrations (nM) by source water, in finished effluent disinfected with CL2-CL2 in the summer (i.e., the base-case conditions), estimated with random intercept multilevel models. For untransformed coefficient estimates and statistical significance, refer to Tables D.8 and D.10 respectively. (Note: effect of MIX and GI on HAN concentrations not statistically significant relative to GW.)

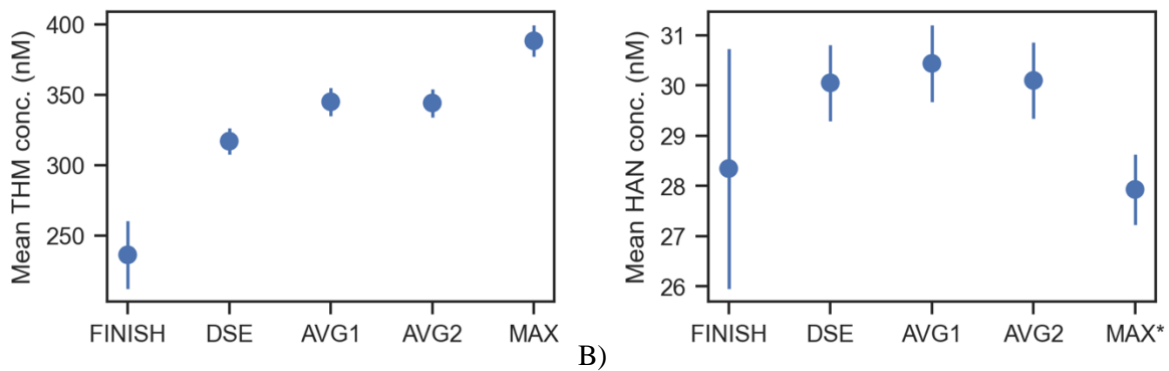

**Figure S3:** Estimated geometric mean of A) THM and B) HAN concentrations (nM) by sample location, in surface water disinfected with CL2-CL2 in the summer (i.e., the base-case conditions), estimated with random intercept multilevel models. For untransformed coefficient estimates and statistical significance, refer to Tables D.8 and D.10 respectively. (Note: effect of MAX on HAN concentrations not statistically significant relative to FINISH.)

## Supplemental Tables

### Key for Supplemental Tables:

Significance is determined based on a 95% confidence level (p-value<0.05) unless indicated otherwise:

- . On the threshold of significance to a 95% confidence level
- \* Significant to a 95% confidence level
- \*\* Significant to a 99% confidence level
- \*\*\* Significant to a 99.9% confidence level

### Random effects table headings:

- Var Variance
- Std Standard deviation

### Fixed effects table headings:

- ci Confidence interval
- SE Standard error
- DF Degrees of freedom
- T-stat T-statistic
- P-val p-value (used to determine significance level)
- Sig Significance level

**Table S1A – Categorical predictor variables, with coding used in the model and number of records per category.**

| Predictor                   | Categories                        | Modeling code  | # records |
|-----------------------------|-----------------------------------|----------------|-----------|
| Source water type (SRC)     | Surface water (SW)                | SRC1           | 6772      |
|                             | Groundwater (GW)                  | SRC2           | 2405      |
|                             | Mixed (MIX)                       | SRC3           | 119       |
|                             | GW under the influence of SW (GI) | SRC4           | 166       |
|                             | Purchased/wholesale (PUR)         | SRC5           | 125       |
| DS sampling location (EVNT) | FINISH                            | EVNT1          | 1962      |
|                             | DSE                               | EVNT2          | 1922      |
|                             | AVG1                              | EVNT3          | 1972      |
|                             | AVG2                              | EVNT4          | 1948      |
|                             | MAX                               | EVNT5          | 1967      |
| Season (SEAS)               | Summer (Jun-Aug)                  | SEAS1          | 2652      |
|                             | Autumn (Sept-Nov)                 | SEAS2          | 3249      |
|                             | Winter (Dec-Feb)                  | SEAS3          | 2009      |
|                             | Spring (Mar-May)                  | SEAS4          | 1677      |
| Disinfectant sequence (DIS) | Cl2-CL2                           | DISCL2_CL2     | 4486      |
|                             | CL2                               | DISnan_CL2     | 1628      |
|                             | Cl2-CLM-CLM                       | DISCL2_CLM_CLM | 1791      |
|                             | CLM*                              | DISCLM_CLM     | 478       |
|                             | CL2-CLM                           | DISCL2_CLM     | 423       |
|                             | CLX-CL2                           | DISCLX_CL2     | 213       |
|                             | CLX-CLM                           | DISCLX_CLM     | 196       |
|                             | O3-CL2                            | DISO3_CL2      | 121       |
| O3-CLM                      | DISO3_CLM                         | 251            |           |

**Table S1B – Statistics of distribution system measurements by sampling location.**

| DS Sampling location (EVNT)     | Modeling code | mean | std  | min | 25%  | 50%  | 75%  | max   |
|---------------------------------|---------------|------|------|-----|------|------|------|-------|
| Finished effluent               | FINISH        | NA   | NA   | NA  | NA   | NA   | NA   | NA    |
| Distribution system equivalent* | DSE           | 16.5 | 18.2 | 1.0 | 3.0  | 10.0 | 24.0 | 120.0 |
| Average RT                      | AVG1          | 27.2 | 34.1 | 1.0 | 6.0  | 17.0 | 35.0 | 240.0 |
| Average RT                      | AVG2          | 31.4 | 48.8 | 1.0 | 6.0  | 20.0 | 36.0 | 960.0 |
| Maximum RT                      | MAX           | 68.7 | 88.0 | 1.0 | 18.0 | 48.0 | 84.0 | 999.0 |

*Table notes:* Distribution system equivalent (DSE) is a real distribution system sample collected from an intermediate location, which was typically closer to the entrance to the distribution system compared to AVG1 and AVG2.

**Table S2A – Variances (random effects) and coefficient estimates (fixed effects) for the bivariate multilevel model with HANs (log–nM) as the outcome variable and THMs (log–nM) as a predictor variable.**

| Random effect  | Var      | Std    |         |       |          |        |           |     |
|----------------|----------|--------|---------|-------|----------|--------|-----------|-----|
| WTP intercepts | 0.087    | 0.295  |         |       |          |        |           |     |
| WTP slopes     | 0.008    | 0.088  |         |       |          |        |           |     |
| Residual       | 0.128    | 0.357  |         |       |          |        |           |     |
| Coefficient    | Estimate | 2.5_ci | 97.5_ci | SE    | DF       | T-stat | P-val     | Sig |
| Intercept      | 1.334    | 1.257  | 1.411   | 0.039 | 574.803  | 34.078 | 4.38E-140 | *** |
| Slope          | 0.349    | 0.333  | 0.365   | 0.008 | 1148.152 | 41.509 | 9.29E-231 | *** |

*Table notes:* Confidence intervals, standard error, and significance are all on the estimate of the regression coefficients, i.e., the population means, and not the dispersal of the estimated coefficients for the 412 individual linear regressions.

**Table S2B – Sensitivity analysis: Variances (random effects) and coefficient estimates (fixed effects) for the bivariate multilevel model with HANs (log–nM) as the outcome variable and THMs (log–nM) as a predictor variable, fit to the full-MRL dataset.**

| Random effect  | Var      | Std    |         |       |          |        |       |     |
|----------------|----------|--------|---------|-------|----------|--------|-------|-----|
| WTP intercepts | 0.030    | 0.173  |         |       |          |        |       |     |
| WTP slopes     | 0.004    | 0.067  |         |       |          |        |       |     |
| Residual       | 0.076    | 0.276  |         |       |          |        |       |     |
| Coefficient    | Estimate | 2.5_ci | 97.5_ci | SE    | DF       | T-stat | P-val | Sig |
| Intercept      | 1.820    | 1.757  | 1.883   | 0.032 | 850.972  | 56.329 | 0.0   | *** |
| THM4_log       | 0.294    | 0.280  | 0.308   | 0.007 | 1803.220 | 42.327 | 0.0   | *** |

*Table notes:* Confidence intervals, standard error, and significance are all on the estimate of the regression coefficients, i.e., the population means, and not the dispersal of the estimated coefficients for the 412 individual linear regressions.

**Table S3 – Variances (random effects) and coefficient estimates (fixed effects) for the univariate multilevel model with HANs (log–nM) as the outcome variable.**

| Random effect  | Var      | Std    |         |       |         |        |       |     |
|----------------|----------|--------|---------|-------|---------|--------|-------|-----|
| WTP intercepts | 0.476    | 0.690  |         |       |         |        |       |     |
| Residual       | 0.161    | 0.402  |         |       |         |        |       |     |
| Coefficient    | Estimate | 2.5_ci | 97.5_ci | SE    | DF      | T-stat | P-val | Sig |
| Intercept      | 3.147    | 3.080  | 3.215   | 0.034 | 410.324 | 91.819 | 0.0   | *** |

*Table notes:* Confidence intervals, standard error, and significance are all on the estimate of the regression coefficients, i.e., the population means, and not the dispersal of the estimated coefficients for the 412 individual linear regressions.

**Table S4A – Variances (random effects) and coefficient estimates (fixed effects) for the univariate multilevel model with HAN:THM ratio as the outcome variable (log–nM/nM).**

| Random effect  | Var      | Std     |         |        |          |          |       |     |
|----------------|----------|---------|---------|--------|----------|----------|-------|-----|
| WTP intercepts | 0.480    | 0.693   |         |        |          |          |       |     |
| Residual       | 0.249    | 0.499   |         |        |          |          |       |     |
| Coefficient    | Estimate | 2.5_ci  | 97.5_ci | SE     | DF       | T-stat   | P-val | Sig |
| Intercept      | -1.9819  | -2.0498 | -1.9141 | 0.0346 | 411.7739 | -57.2711 | 0.0   | *** |

*Table notes:* Confidence intervals, standard error, and significance are all on the estimate of the regression coefficients, i.e., the population means, and not the dispersal of the estimated coefficients for the 412 individual linear regressions.

**Table S4B – Sensitivity analysis: Variances (random effects) and coefficient estimates (fixed effects) for the univariate multilevel model with HAN:THM ratio as the outcome variable (log–nM/nM), fit to the full-MRL dataset.**

| Random effect | Var      | Std    |         |       |         |         |       |     |
|---------------|----------|--------|---------|-------|---------|---------|-------|-----|
| WTP           | 0.425    | 0.652  |         |       |         |         |       |     |
| Residual      | 0.187    | 0.432  |         |       |         |         |       |     |
| Coefficient   | Estimate | 2.5_ci | 97.5_ci | SE    | DF      | T-stat  | P-val | Sig |
| Intercept     | -1.843   | -1.906 | -1.779  | 0.032 | 411.264 | -56.737 | 0.0   | *** |

*Table notes:* Confidence intervals, standard error, and significance are all on the estimate of the regression coefficients, i.e., the population means, and not the dispersal of the estimated coefficients for the 412 individual linear regressions.

**Table S5A – Variances (random effects) and coefficient estimates (fixed effects) for the multilevel random intercept model with HAN:THM ratio as the outcome variable (log–nM/nM) and categorical predictor variables.**

| <b>Random effects</b> | <b>Var</b>      | <b>Std</b>    |                |           |           |               |              |            |
|-----------------------|-----------------|---------------|----------------|-----------|-----------|---------------|--------------|------------|
| WTP intercepts        | 0.283           | 0.532         |                |           |           |               |              |            |
| Residual              | 0.212           | 0.460         |                |           |           |               |              |            |
| <b>Fixed effects</b>  | <b>Estimate</b> | <b>2.5_ci</b> | <b>97.5_ci</b> | <b>SE</b> | <b>DF</b> | <b>T-stat</b> | <b>P-val</b> | <b>Sig</b> |
| (Intercept)           | -2.133          | -2.210        | -2.055         | 0.039     | 686.164   | -54.167       | 0.000        | ***        |
| SRC2                  | 0.976           | 0.798         | 1.154          | 0.091     | 781.053   | 10.767        | 0.000        | ***        |
| SRC3                  | 0.548           | 0.273         | 0.822          | 0.140     | 8418.078  | 3.912         | 0.000        | ***        |
| SRC4                  | 0.423           | 0.072         | 0.774          | 0.179     | 6100.803  | 2.364         | 0.018        | *          |
| SRC5                  | 0.216           | -0.366        | 0.798          | 0.297     | 577.937   | 0.728         | 0.467        |            |
| EVNT2                 | -0.235          | -0.264        | -0.205         | 0.015     | 9134.785  | -15.683       | 0.000        | ***        |
| EVNT3                 | -0.307          | -0.336        | -0.278         | 0.015     | 9135.273  | -20.646       | 0.000        | ***        |
| EVNT4                 | -0.315          | -0.344        | -0.286         | 0.015     | 9135.107  | -21.142       | 0.000        | ***        |
| EVNT5                 | -0.511          | -0.540        | -0.481         | 0.015     | 9135.387  | -34.329       | 0.000        | ***        |
| SEAS2                 | 0.112           | 0.083         | 0.142          | 0.015     | 9208.818  | 7.561         | 0.000        | ***        |
| SEAS3                 | 0.323           | 0.290         | 0.356          | 0.017     | 9230.221  | 18.993        | 0.000        | ***        |
| SEAS4                 | 0.180           | 0.146         | 0.215          | 0.018     | 9243.595  | 10.188        | 0.000        | ***        |
| DISCL2_CLM            | 0.010           | -0.126        | 0.146          | 0.069     | 5107.905  | 0.145         | 0.885        |            |
| DISCL2_CLM_CLM        | 0.176           | 0.059         | 0.293          | 0.060     | 1055.646  | 2.949         | 0.003        | **         |
| DISCLM                | 0.202           | 0.011         | 0.392          | 0.097     | 2162.100  | 2.075         | 0.038        | *          |
| DISCLX_CL2            | -0.336          | -0.598        | -0.075         | 0.133     | 1454.906  | -2.519        | 0.012        | *          |
| DISCLX_CLM            | -0.126          | -0.318        | 0.067          | 0.098     | 2947.433  | -1.281        | 0.200        |            |
| DISnan_CL2            | -0.041          | -0.326        | 0.244          | 0.145     | 1047.154  | -0.280        | 0.780        |            |
| DISO3_CL2             | 0.112           | -0.090        | 0.315          | 0.103     | 5432.113  | 1.086         | 0.277        |            |
| DISO3_CLM             | 0.256           | 0.036         | 0.476          | 0.112     | 2521.935  | 2.282         | 0.023        | *          |

*Table key:* ci: 95% confidence interval; SE: standard error; DF: degrees freedom; Sig, significance, with \* indicating 95% confidence level, \*\* indicating 99% confidence level, and \*\*\* indicating above the 99.9% confidence level.

**Table S5B – Coefficient estimates for interaction terms in the multilevel random intercept model with HAN:THM ratio as the outcome variable (log–nM/nM) and categorical predictor variables.**

| Fixed effects       | Estimate | 2.5_ci | 97.5_ci | SE    | T-stat | P-val | Sig |
|---------------------|----------|--------|---------|-------|--------|-------|-----|
| SRC2:DISCL2_CLM     | 0.191    | -0.886 | 1.267   | 0.549 | 0.347  | 0.729 |     |
| SRC3:DISCL2_CLM     | -0.143   | -1.239 | 0.953   | 0.559 | -0.256 | 0.798 |     |
| SRC2:DISCL2_CLM_CLM | -0.326   | -0.622 | -0.031  | 0.151 | -2.164 | 0.031 | *   |
| SRC3:DISCL2_CLM_CLM | -0.514   | -1.026 | -0.003  | 0.261 | -1.971 | 0.049 | *   |
| SRC2:DISCLM         | -0.249   | -0.599 | 0.100   | 0.178 | -1.397 | 0.163 |     |
| SRC4:DISCLM         | 1.461    | 0.346  | 2.577   | 0.569 | 2.567  | 0.011 | *   |
| SRC5:DISCLM         | -0.413   | -1.089 | 0.263   | 0.345 | -1.196 | 0.232 |     |
| SRC3:DISCLX_CL2     | -1.389   | -2.520 | -0.258  | 0.577 | -2.408 | 0.016 | *   |
| SRC2:DISnan_CL2     | 0.333    | -0.014 | 0.680   | 0.177 | 1.880  | 0.060 | .   |
| SRC4:DISnan_CL2     | 0.918    | 0.405  | 1.431   | 0.262 | 3.505  | 0.000 | *** |
| SRC2:DISO3_CLM      | -0.424   | -1.514 | 0.667   | 0.556 | -0.762 | 0.447 |     |
| SRC2:SEAS2          | -0.116   | -0.172 | -0.060  | 0.029 | -4.051 | 0.000 | *** |
| SRC3:SEAS2          | -0.061   | -0.279 | 0.157   | 0.111 | -0.548 | 0.584 |     |
| SRC4:SEAS2          | -0.391   | -0.588 | -0.193  | 0.101 | -3.875 | 0.000 | *** |
| SRC5:SEAS2          | 0.096    | -0.148 | 0.340   | 0.124 | 0.772  | 0.440 |     |
| SRC2:SEAS3          | -0.310   | -0.375 | -0.244  | 0.033 | -9.313 | 0.000 | *** |
| SRC3:SEAS3          | 0.026    | -0.211 | 0.263   | 0.121 | 0.218  | 0.827 |     |
| SRC4:SEAS3          | -0.521   | -0.734 | -0.307  | 0.109 | -4.772 | 0.000 | *** |
| SRC5:SEAS3          | 0.012    | -0.239 | 0.263   | 0.128 | 0.091  | 0.927 |     |
| SRC2:SEAS4          | -0.155   | -0.222 | -0.087  | 0.034 | -4.498 | 0.000 | *** |
| SRC3:SEAS4          | -0.058   | -0.399 | 0.283   | 0.174 | -0.334 | 0.738 |     |
| SRC4:SEAS4          | -0.388   | -0.616 | -0.160  | 0.116 | -3.333 | 0.001 | *** |
| SRC5:SEAS4          | -0.045   | -0.319 | 0.229   | 0.140 | -0.324 | 0.746 |     |

*Table key:* ci: 95% confidence interval; SE: standard error; DF: degrees freedom; Sig, significance, with \* indicating 95% confidence level, \*\* indicating 99% confidence level, and \*\*\* indicating above the 99.9% confidence level.



**Table S5C – Sensitivity analysis of the impact of left-censoring on the multilevel model with HAN:THM ratio as the outcome variable (log–nM/nM) and categorical predictor variables, fit to the full-MRL dataset.**

| Random effects | Var      | Std    |         |       |          |         |       |     |
|----------------|----------|--------|---------|-------|----------|---------|-------|-----|
| WTP intercepts | 0.233    | 0.483  |         |       |          |         |       |     |
| Residual       | 0.156    | 0.395  |         |       |          |         |       |     |
| Fixed effects  | Estimate | 2.5_ci | 97.5_ci | SE    | DF       | T-stat  | P-val | Sig |
| (Intercept)    | -2.013   | -2.082 | -1.944  | 0.035 | 674.823  | -57.241 | 0.000 | *** |
| SRC2           | 1.016    | 0.858  | 1.175   | 0.081 | 807.258  | 12.592  | 0.000 | *** |
| SRC3           | 0.555    | 0.318  | 0.791   | 0.121 | 8425.924 | 4.594   | 0.000 | *** |
| SRC4           | 0.488    | 0.184  | 0.792   | 0.155 | 6577.808 | 3.148   | 0.002 | **  |
| SRC5           | 0.129    | -0.393 | 0.650   | 0.266 | 568.689  | 0.483   | 0.629 |     |
| EVNT2          | -0.216   | -0.242 | -0.191  | 0.013 | 9132.747 | -16.871 | 0.000 | *** |
| EVNT3          | -0.289   | -0.314 | -0.264  | 0.013 | 9133.164 | -22.692 | 0.000 | *** |
| EVNT4          | -0.290   | -0.315 | -0.264  | 0.013 | 9133.022 | -22.658 | 0.000 | *** |
| EVNT5          | -0.451   | -0.476 | -0.426  | 0.013 | 9133.276 | -35.406 | 0.000 | *** |
| SEAS2          | 0.116    | 0.091  | 0.141   | 0.013 | 9201.304 | 9.112   | 0.000 | *** |
| SEAS3          | 0.316    | 0.287  | 0.344   | 0.015 | 9221.349 | 21.655  | 0.000 | *** |
| SEAS4          | 0.174    | 0.144  | 0.203   | 0.015 | 9234.130 | 11.454  | 0.000 | *** |
| DISCL2_CLM     | 0.036    | -0.082 | 0.154   | 0.060 | 5582.129 | 0.602   | 0.547 |     |
| DISCL2_CLM_CLM | 0.154    | 0.050  | 0.258   | 0.053 | 1136.309 | 2.906   | 0.004 | **  |
| DISCLM         | 0.243    | 0.076  | 0.409   | 0.085 | 2333.246 | 2.850   | 0.004 | **  |
| DISCLX_CL2     | -0.262   | -0.492 | -0.032  | 0.117 | 1607.515 | -2.229  | 0.026 | *   |
| DISCLX_CLM     | -0.086   | -0.254 | 0.083   | 0.086 | 3178.794 | -0.998  | 0.318 |     |
| DISnan_CL2     | 0.010    | -0.242 | 0.263   | 0.129 | 1117.413 | 0.080   | 0.936 |     |
| DISO3_CL2      | 0.125    | -0.051 | 0.301   | 0.090 | 5843.457 | 1.392   | 0.164 |     |
| DISO3_CLM      | 0.287    | 0.095  | 0.480   | 0.098 | 2819.979 | 2.927   | 0.003 | **  |
| SRC2:SEAS2     | -0.105   | -0.153 | -0.057  | 0.025 | 9207.954 | -4.267  | 0.000 | *** |
| SRC3:SEAS2     | -0.049   | -0.236 | 0.138   | 0.095 | 9146.863 | -0.512  | 0.609 |     |
| SRC4:SEAS2     | -0.310   | -0.479 | -0.140  | 0.086 | 9285.800 | -3.585  | 0.000 | *** |
| SRC5:SEAS2     | 0.060    | -0.149 | 0.269   | 0.107 | 9169.218 | 0.567   | 0.571 |     |
| SRC2:SEAS3     | -0.297   | -0.353 | -0.242  | 0.029 | 9225.907 | -10.437 | 0.000 | *** |
| SRC3:SEAS3     | 0.034    | -0.169 | 0.238   | 0.104 | 9268.478 | 0.332   | 0.740 |     |
| SRC4:SEAS3     | -0.383   | -0.566 | -0.200  | 0.094 | 9181.961 | -4.095  | 0.000 | *** |
| SRC5:SEAS3     | -0.032   | -0.247 | 0.183   | 0.110 | 9190.980 | -0.291  | 0.771 |     |
| SRC2:SEAS4     | -0.141   | -0.198 | -0.083  | 0.030 | 9228.665 | -4.763  | 0.000 | *** |
| SRC3:SEAS4     | -0.052   | -0.344 | 0.241   | 0.149 | 9142.360 | -0.346  | 0.729 |     |

|                     |        |        |        |       |          |        |       |     |
|---------------------|--------|--------|--------|-------|----------|--------|-------|-----|
| SRC4:SEAS4          | -0.401 | -0.597 | -0.206 | 0.100 | 9173.455 | -4.020 | 0.000 | *** |
| SRC5:SEAS4          | -0.053 | -0.287 | 0.182  | 0.120 | 9194.335 | -0.440 | 0.660 |     |
| SRC2:DISCL2_CLM     | 0.078  | -0.897 | 1.053  | 0.497 | 389.188  | 0.156  | 0.876 |     |
| SRC3:DISCL2_CLM     | -0.275 | -1.265 | 0.715  | 0.505 | 421.488  | -0.545 | 0.586 |     |
| SRC2:DISCL2_CLM_CLM | -0.431 | -0.691 | -0.171 | 0.133 | 1729.220 | -3.251 | 0.001 | **  |
| SRC3:DISCL2_CLM_CLM | -0.520 | -0.962 | -0.078 | 0.225 | 7511.768 | -2.307 | 0.021 | *   |
| SRC2:DISCLM         | -0.296 | -0.603 | 0.010  | 0.156 | 2291.996 | -1.897 | 0.058 | .   |
| SRC4:DISCLM         | 1.134  | 0.127  | 2.141  | 0.514 | 436.547  | 2.207  | 0.028 | *   |
| SRC5:DISCLM         | -0.294 | -0.895 | 0.307  | 0.307 | 869.042  | -0.960 | 0.337 |     |
| SRC3:DISCLX_CL2     | -1.377 | -2.397 | -0.357 | 0.520 | 452.910  | -2.646 | 0.008 | **  |
| SRC2:DISnan_CL2     | 0.182  | -0.126 | 0.490  | 0.157 | 1008.832 | 1.160  | 0.246 |     |
| SRC4:DISnan_CL2     | 0.583  | 0.138  | 1.028  | 0.227 | 5430.951 | 2.565  | 0.010 | *   |
| SRC2:DISO3_CLM      | -0.566 | -1.553 | 0.420  | 0.503 | 399.929  | -1.125 | 0.261 |     |

Table key: ci: 95% confidence interval; SE: standard error; DF: degrees freedom; Sig, significance, with \* indicating 95% confidence level, \*\* indicating 99% confidence level, and \*\*\* indicating above the 99.9% confidence level.

**Table S6 – ANOVA results for the multilevel random intercept model with HAN:THM ratio as the outcome variable (log–nM/nM) and categorical predictor variables.**

| Predictor | SS      | MS     | NumDF | DenomDF  | F-stat  | P-value    | Sig |
|-----------|---------|--------|-------|----------|---------|------------|-----|
| SRC       | 7.592   | 1.898  | 4     | 544.672  | 8.940   | 5.352e-07  | *** |
| EVNT      | 259.543 | 64.885 | 4     | 9134.476 | 305.629 | 3.882e-247 | *** |
| SEAS      | 4.192   | 1.397  | 3     | 9222.056 | 6.582   | 1.934-04   | *** |
| DIS       | 5.676   | 0.709  | 8     | 737.100  | 3.341   | 9.080e-04  | *** |
| SRC:DIS   | 7.492   | 0.681  | 11    | 716.825  | 3.208   | 2.814e-04  | *** |
| SRC:SEAS  | 23.453  | 1.954  | 12    | 9219.638 | 9.206   | 6.331e-18  | *** |

Table key: SS, sum of squares; MS, sum of squares divided by the degrees of freedom; DF, degrees of freedom; Sig, significance, with \* indicating 95% confidence level, \*\* indicating 99% confidence level, and \*\*\* indicating above the 99.9% confidence level.

**Table S7 – Variances (random effects) and estimated coefficients (fixed effects) for the multilevel model with HAN concentration as the outcome variable (log–nM).**

| Random effects | Var      | Std    |         |       |          |        |       |     |
|----------------|----------|--------|---------|-------|----------|--------|-------|-----|
| WTP intercepts | 0.398    | 0.631  |         |       |          |        |       |     |
| Residual       | 0.157    | 0.396  |         |       |          |        |       |     |
| Fixed effects  | Estimate | 2.5_ci | 97.5_ci | SE    | DF       | T-stat | P-val | Sig |
| (Intercept)    | 3.345    | 3.260  | 3.429   | 0.043 | 624.856  | 77.830 | 0.000 | *** |
| SRC2           | -0.635   | -0.822 | -0.447  | 0.096 | 961.754  | -6.617 | 0.000 | *** |
| SRC3           | -0.114   | -0.358 | 0.131   | 0.125 | 8351.934 | -0.912 | 0.362 |     |
| SRC4           | -0.203   | -0.519 | 0.113   | 0.161 | 8424.328 | -1.261 | 0.207 |     |
| SRC5           | 0.243    | -0.405 | 0.892   | 0.331 | 530.295  | 0.735  | 0.463 |     |
| EVNT2          | 0.058    | 0.033  | 0.084   | 0.013 | 9122.407 | 4.540  | 0.000 | *** |
| EVNT3          | 0.071    | 0.046  | 0.096   | 0.013 | 9122.570 | 5.576  | 0.000 | *** |
| EVNT4          | 0.060    | 0.035  | 0.085   | 0.013 | 9122.508 | 4.683  | 0.000 | *** |
| EVNT5          | -0.015   | -0.040 | 0.010   | 0.013 | 9122.670 | -1.156 | 0.248 |     |
| SEAS2          | -0.029   | -0.054 | -0.004  | 0.013 | 9170.034 | -2.240 | 0.025 | *   |
| SEAS3          | -0.105   | -0.134 | -0.076  | 0.015 | 9184.250 | -7.179 | 0.000 | *** |
| SEAS4          | -0.043   | -0.073 | -0.013  | 0.015 | 9193.795 | -2.815 | 0.005 | **  |
| DISCL2_CLM     | -0.209   | -0.333 | -0.085  | 0.063 | 7669.740 | -3.307 | 0.001 | *** |
| DISCL2_CLM_CLM | 0.042    | -0.077 | 0.161   | 0.061 | 1691.950 | 0.691  | 0.490 |     |
| DISCLM         | -0.395   | -0.578 | -0.212  | 0.093 | 3371.409 | -4.236 | 0.000 | *** |
| DISCLX_CL2     | -0.270   | -0.527 | -0.013  | 0.131 | 2661.482 | -2.059 | 0.040 | *   |
| DISCLX_CLM     | -0.498   | -0.680 | -0.317  | 0.093 | 4488.945 | -5.381 | 0.000 | *** |
| DISnan_CL2     | -0.007   | -0.297 | 0.283   | 0.148 | 1603.468 | -0.048 | 0.962 |     |
| DISO3_CL2      | -0.292   | -0.476 | -0.108  | 0.094 | 7681.518 | -3.108 | 0.002 | **  |
| DISO3_CLM      | -0.375   | -0.583 | -0.167  | 0.106 | 4663.158 | -3.534 | 0.000 | *** |

*Table key:* ci: 95% confidence interval; SE: standard error; DF: degrees freedom; Sig, significance, with \* indicating 95% confidence level, \*\* indicating 99% confidence level, and \*\*\* indicating above the 99.9% confidence level. *Table notes:* Estimates for interaction coefficients not included for brevity.

**Table S8 – Variances (random effects) and estimated coefficients (fixed effects) for the multilevel model with THM concentration as the outcome variable (log–nM).**

| <b>Random effects</b> | <b>Var</b>      | <b>Std</b>    |                |           |           |               |              |            |
|-----------------------|-----------------|---------------|----------------|-----------|-----------|---------------|--------------|------------|
| WTP intercepts        | 0.591           | 0.769         |                |           |           |               |              |            |
| Residual              | 0.206           | 0.454         |                |           |           |               |              |            |
| <b>Fixed effects</b>  | <b>Estimate</b> | <b>2.5_ci</b> | <b>97.5_ci</b> | <b>SE</b> | <b>DF</b> | <b>T-stat</b> | <b>P-val</b> | <b>Sig</b> |
| (Intercept)           | 5.466           | 5.365         | 5.567          | 0.052     | 626.119   | 105.886       | 0.000        | ***        |
| SRC2                  | -1.546          | -1.769        | -1.322         | 0.114     | 1025.219  | -13.550       | 0.000        | ***        |
| SRC3                  | -0.640          | -0.923        | -0.358         | 0.144     | 8340.499  | -4.444        | 0.000        | ***        |
| SRC4                  | -0.553          | -0.918        | -0.188         | 0.186     | 8736.768  | -2.971        | 0.003        | **         |
| SRC5                  | 0.093           | -0.690        | 0.875          | 0.399     | 532.755   | 0.232         | 0.817        |            |
| EVNT2                 | 0.293           | 0.264         | 0.322          | 0.015     | 9128.667  | 19.869        | 0.000        | ***        |
| EVNT3                 | 0.378           | 0.349         | 0.407          | 0.015     | 9128.785  | 25.794        | 0.000        | ***        |
| EVNT4                 | 0.375           | 0.346         | 0.404          | 0.015     | 9128.737  | 25.528        | 0.000        | ***        |
| EVNT5                 | 0.496           | 0.467         | 0.524          | 0.015     | 9128.879  | 33.802        | 0.000        | ***        |
| SEAS2                 | -0.141          | -0.170        | -0.112         | 0.015     | 9171.479  | -9.615        | 0.000        | ***        |
| SEAS3                 | -0.429          | -0.461        | -0.396         | 0.017     | 9184.220  | -25.512       | 0.000        | ***        |
| SEAS4                 | -0.223          | -0.258        | -0.189         | 0.017     | 9192.828  | -12.795       | 0.000        | ***        |
| DISCL2_CLM            | -0.230          | -0.373        | -0.087         | 0.073     | 8091.243  | -3.147        | 0.002        | **         |
| DISCL2_CLM_CLM        | -0.132          | -0.272        | 0.009          | 0.071     | 1912.576  | -1.840        | 0.066        | .          |
| DISCLM                | -0.576          | -0.789        | -0.362         | 0.109     | 3730.676  | -5.289        | 0.000        | ***        |
| DISCLX_CL2            | 0.045           | -0.256        | 0.345          | 0.154     | 3052.689  | 0.290         | 0.772        |            |
| DISCLX_CLM            | -0.288          | -0.499        | -0.077         | 0.108     | 4901.572  | -2.674        | 0.008        | **         |
| DISnan_CL2            | -0.026          | -0.368        | 0.316          | 0.175     | 1800.239  | -0.149        | 0.882        |            |
| DISO3_CL2             | -0.420          | -0.632        | -0.207         | 0.109     | 8071.424  | -3.866        | 0.000        | ***        |
| DISO3_CLM             | -0.590          | -0.832        | -0.348         | 0.123     | 5233.271  | -4.780        | 0.000        | ***        |

*Table key:* ci: 95% confidence interval; SE: standard error; DF: degrees freedom; Sig, significance, with \* indicating 95% confidence level, \*\* indicating 99% confidence level, and \*\*\* indicating above the 99.9% confidence level. *Table notes:* Estimates for interaction coefficients not included for brevity.

**Table S9 — Prior odds-ratio estimates for risk of DBP-exposure (vs bladder cancer and reproductive anomalies)**

| Condition                                                         | Source                     | THM4 Exposure (µg/L) | THM4 Baseline (µg/L) | Subset | OR Estimate |
|-------------------------------------------------------------------|----------------------------|----------------------|----------------------|--------|-------------|
| <b>Bladder cancer</b><br><br>(Hrudey et al. 2015)                 | King & Marrett 1996        | >25                  | <25                  | -      | 1.4         |
|                                                                   | King & Marrett 1996        | >75                  | <25                  | -      | 1.7         |
|                                                                   | Chevrier et al. 2004       | >50                  | <1                   | male   | 3.73        |
|                                                                   | Chevrier et al. 2004       | >50                  | <1                   | female | 1.55        |
|                                                                   | Villanueva et al. 2007     | >49                  | <8                   | male   | 2.53        |
|                                                                   | Villanueva et al. 2007     | >49                  | <8                   | female | 1.5         |
|                                                                   | Cantor et al. 2010         | >49                  | <8                   | -      | 1.8         |
| <b>Reproductive anomalies</b><br><br>(Nieuwenhuijsen et al. 2009) | Bove et al. 1995           | >80                  | <20                  | -      | 1.57        |
|                                                                   | Chisholm et al. 2008       | >130                 | <60                  | -      | 1.22        |
|                                                                   | Hwang et al. 2008          | >20                  | <4                   | -      | 1.0         |
|                                                                   | Nieuwenhuijsen et al. 2008 | >60                  | <30                  | -      | 1.43        |
|                                                                   | Hwang et al. 2008          | >20                  | <4                   | -      | 1.81        |
